# Supplementary material
Source: Springer Nature journal article supplement (https://www.springermedizin.de/resource/supplementary/12985_2013_2551_MOESM5_ESM.pdf/9606970)
Supplement: MOESM5 [file 9606970]

| <b>Viral Isolate</b>                | <b>Region 1</b>         | <b>Region 2</b>             | <b>Region 3</b>                     |
|-------------------------------------|-------------------------|-----------------------------|-------------------------------------|
| F4, E5, & E3                        | x2<br>-CTGCGAGAAAGTCTC- | x17<br>-CTTACGCTTCACAGGGGA- | x2      x4<br>-TCAGGCTGC-TCAGGCTGT- |
| E4                                  | x2<br>-CTGCGAGAAAGTCTC- | x15<br>-CTTACGCTTCACAGGGGA- | x2      x4<br>-TCAGGCTGC-TCAGGCTGT- |
| G4                                  | x4<br>-CTGCGAGAAAGTCTC- | x14<br>-CTTACGCTTCACAGGGGA- | x2      x4<br>-TCAGGCTGC-TCAGGCTGT- |
| wt-FV3 and <i>aca-C<sup>r</sup></i> | x3<br>-CTGCGAGAAAGTCTC- | x16<br>-CTTACGCTTCACAGGGGA- | x2      x2<br>-TCAGGCTGC-TCAGGCTGT- |
| SSME                                | x3<br>-CTGCGAGAAAGTCTC- | x16<br>-CTTACGCTTCACAGGGGA- | x2      x2<br>-TCAGGCTGC-TCAGGCTGT- |
| F6                                  | x5<br>-CTGCGAGAAAGTCTC- | x18<br>-CTTACGCTTCACAGGGGA- | x2      x2<br>-TCAGGCTGC-TCAGGCTGT- |
| VR-567                              | x4<br>-CTGCGAGAAAGTCTC- | x4<br>-CTTACGCTTCACAGGGGA-  | x2      x2<br>-TCAGGCTGC-TCAGGCTGT- |
| RGV                                 | x2<br>-CTGCGAGAAAGTCTC- | x10<br>-CTTACGCTTCACAGGGGA- | x2      x2<br>-TCAGGCTGC-TCAGGCTGT- |
| SSTIV                               | x2<br>-CTGCGAGAAAGTCTC- | x18<br>-CTTACGCTTCACAGGGGA- | x2      x2<br>-TCAGGCTGC-TCAGGCTGT- |
| TFV                                 | x3<br>-CTGCGAGAAAGTCTC- | -TGAAACAGACTTGCTGTCTC-      | -TCAGGCT-CCACAACAGCCT-              |
